# Supplementary material for: Alkali-assisted synthesis of polymeric carbon nitride photoanodes with defect and crystallinity-mediated charge transfer for efficient photoelectrochemical water splitting
Source: Royal Society of Chemistry journal article supplement (doi:10.1039/d4nj04011b), 2024-01-01
Supplement: d4nj04011b1.pdf [file d4nj04011b1.pdf]

## Supporting Information

### **Alkali-Assisted Synthesis of Polymeric Carbon Nitride Photoanodes with Defect and Crystallinity-Mediated Charge Transfer for Efficient Photoelectrochemical Water Splitting**

Xiaochun Li,\* Dongsheng Zheng, Wentao Wu, Xuebing Long, Baoyi Yang, Xuejuan Huang,  
Jingjing Duan, Sijie Liu, Bang Lan\* and Renping Cao\*

Northeast Guangdong Key Laboratory of New Functional Materials, School of Chemistry  
and Environment, Jiaying University, Meizhou, 514015, P.R. China

Email: [lixiaochun@jyu.edu.cn](mailto:lixiaochun@jyu.edu.cn); [jyulb6@163.com](mailto:jyulb6@163.com); [jxcrp@163.com](mailto:jxcrp@163.com)

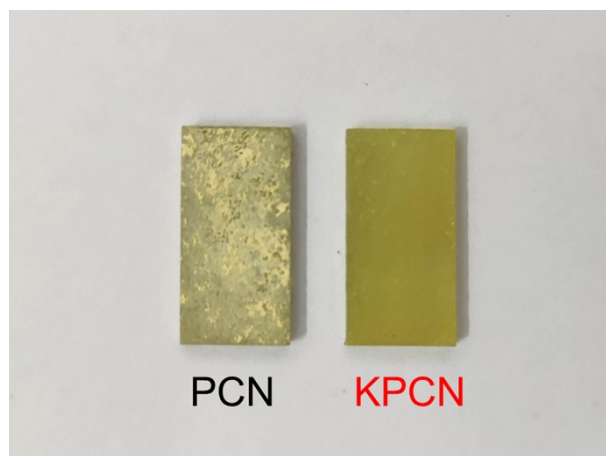

**Figure S1.** The digital photograph of PCN and KPCN.

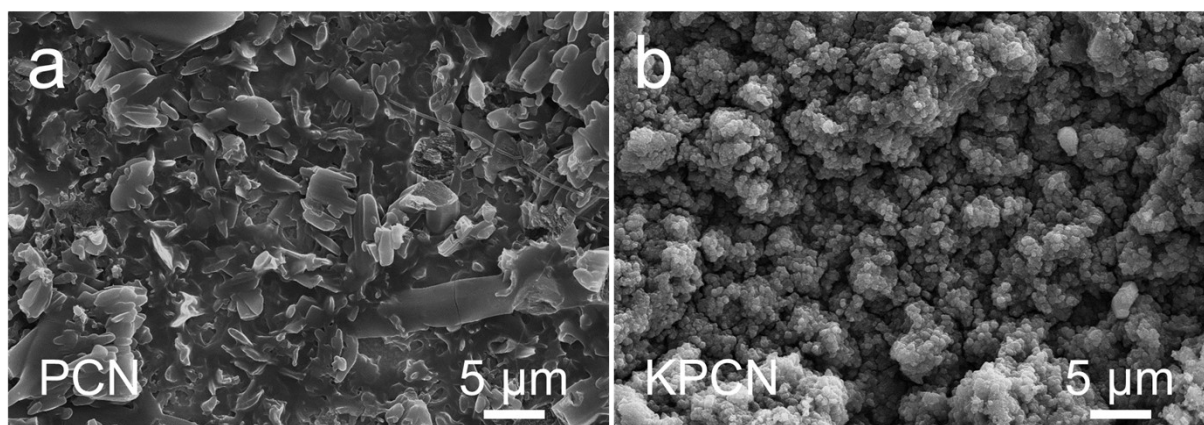

**Figure S2.** Top view SEM images of (a) PCN and (b) KPCN.

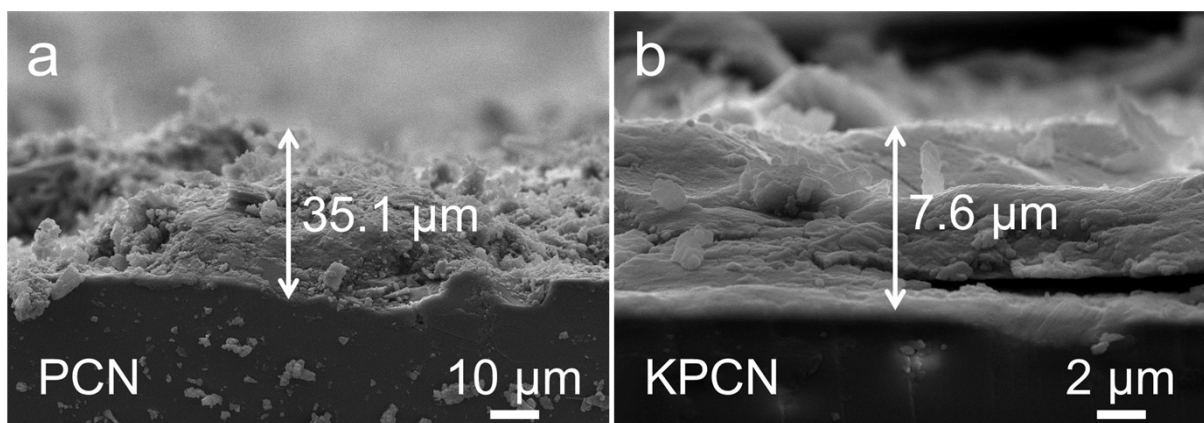

**Figure S3.** Cross-sectional view SEM images of (a) PCN and (b) KPCN.

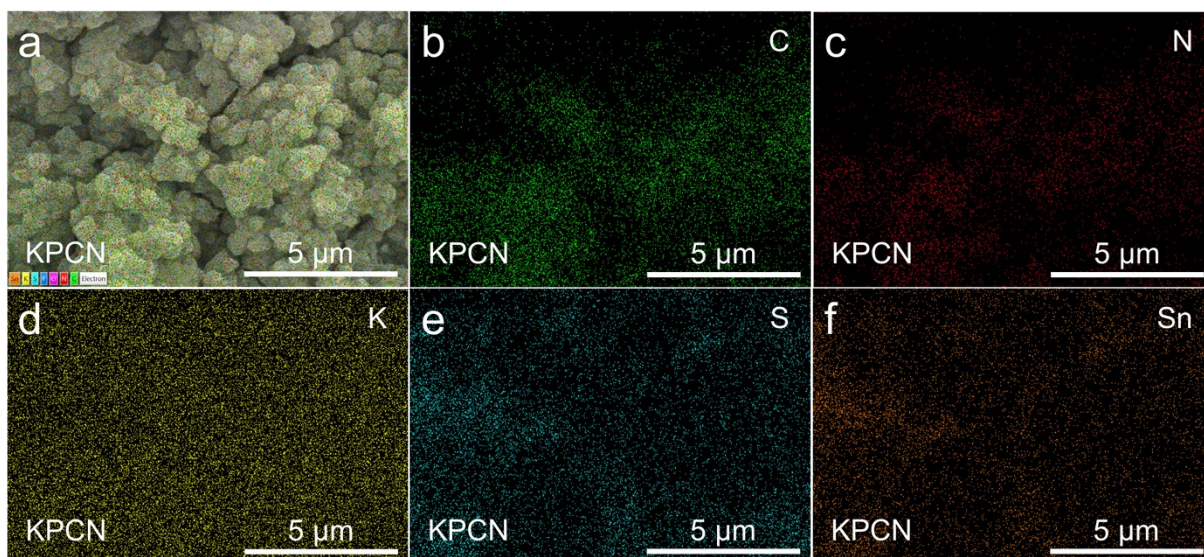

**Figure S4.** (a) SEM image of the KPCN photoanode surface and the corresponding EDS elemental mapping: (b) C, (c) N, (d) K, (e) S and (f) Sn.

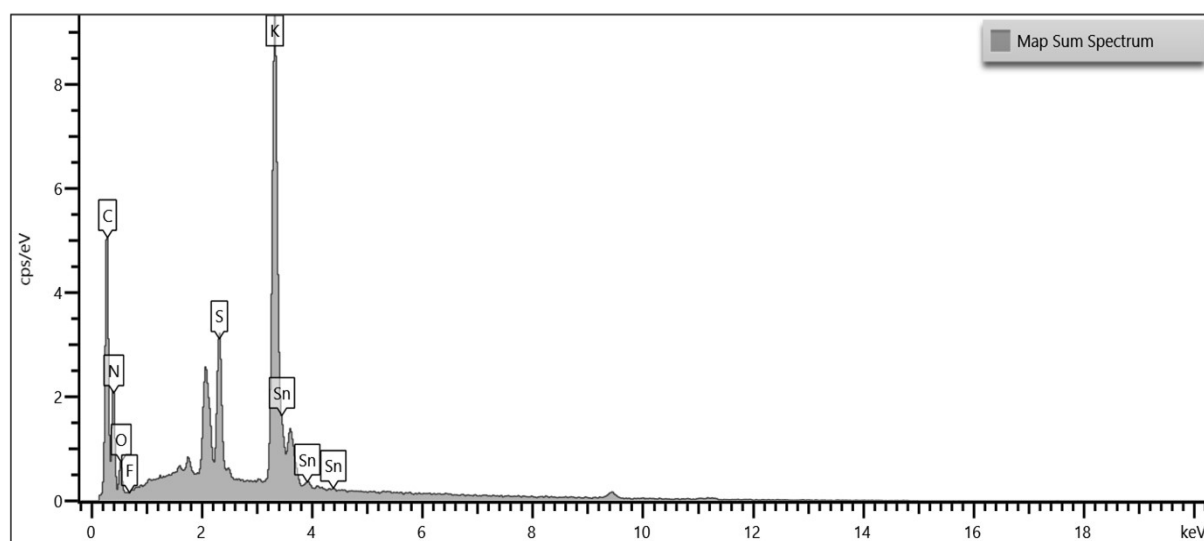

**Figure S5.** EDS results of the KPCN films.

**Table S1.** The detail of the elemental analysis of the KPCN films.

| Element | Line Type | Apparent Concentration | k Ratio | Wt%    | Wt% Sigma | Atomic % | Standard Label   | Factory Standard |
|---------|-----------|------------------------|---------|--------|-----------|----------|------------------|------------------|
| C       | K series  | 17.49                  | 0.17492 | 27.23  | 1.01      | 39.85    | C Vit            | Yes              |
| N       | K series  | 29.54                  | 0.05260 | 32.11  | 2.16      | 40.29    | BN               | Yes              |
| O       | K series  | 2.79                   | 0.00939 | 5.50   | 0.34      | 6.04     | SiO <sub>2</sub> | Yes              |
| F       | K series  | 0.00                   | 0.00000 | 0.00   | 0.14      | 0.00     | CaF <sub>2</sub> | Yes              |
| S       | K series  | 6.30                   | 0.05430 | 4.56   | 0.17      | 2.50     | FeS <sub>2</sub> | Yes              |
| K       | K series  | 30.74                  | 0.26038 | 22.54  | 0.75      | 10.13    | KBr              | Yes              |
| Sn      | L series  | 7.85                   | 0.07847 | 8.05   | 0.43      | 1.19     | Sn               | Yes              |
| Total:  | -         | -                      | -       | 100.00 | -         | 100.00   | -                | -                |

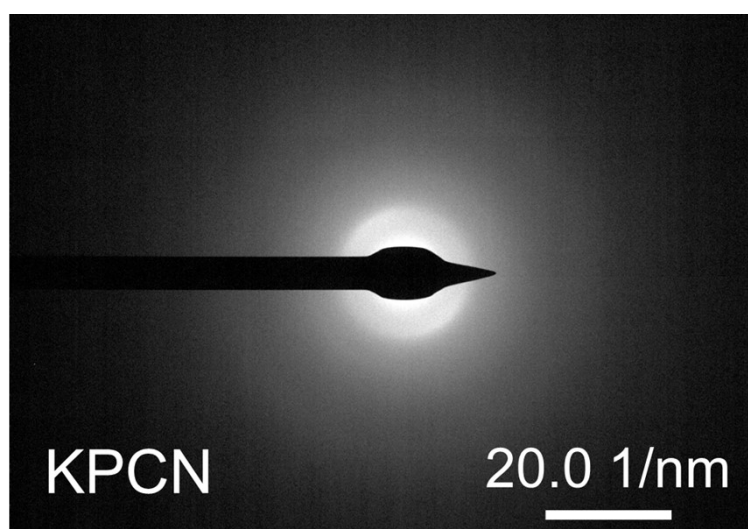

**Figure S6.** SAED pattern of the KPCN films

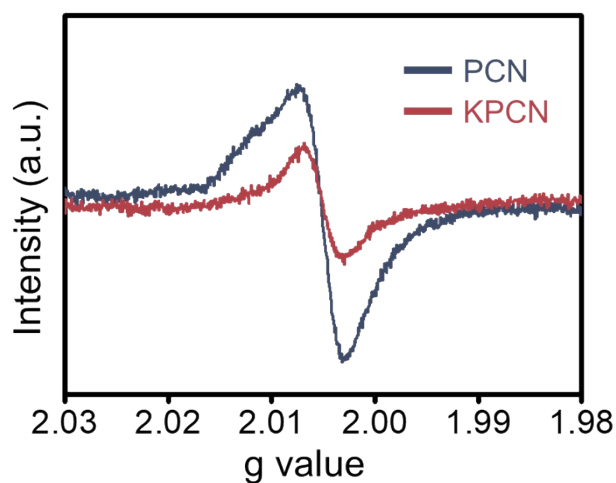

**Figure S7.** EPR spectra of the powder samples scraped from the PCN and KPCN photoanodes conducted in the dark at room temperature.

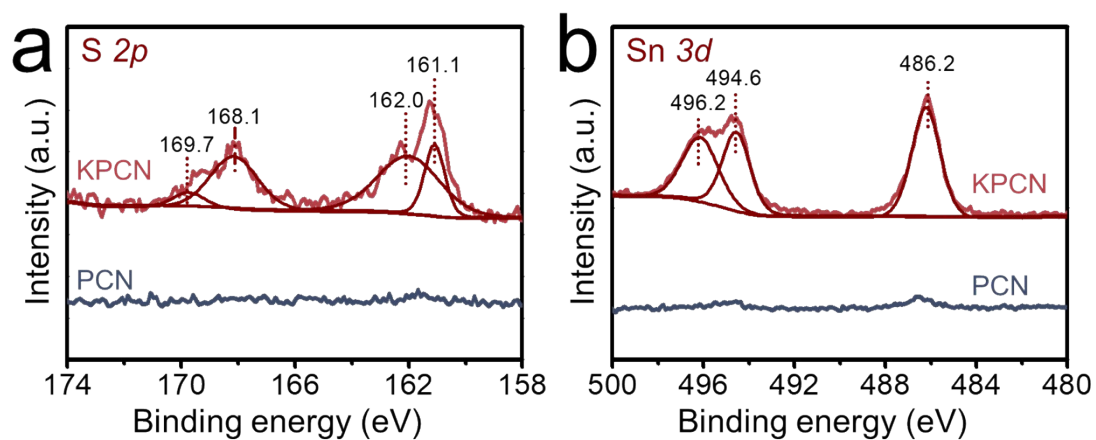

**Figure S8.** High-resolution XPS spectra of PCN and KPCN: (a) S 2*p* and (b) Sn 3*d*.

**Table S2.** Summary of PEC performance of this work and the reported PCN-based photoanodes.

| Catalyst                                                  | Photocurrent density ( $\mu\text{A cm}^{-2}$ ) | Potential vs RHE (V) | Electrolyte                           | Light source                                | Corresponding Author (Ref.) |
|-----------------------------------------------------------|------------------------------------------------|----------------------|---------------------------------------|---------------------------------------------|-----------------------------|
| KPCN photoanode                                           | ca. 162                                        | 1.23                 | 1.0 M NaOH                            | 300 W Xe lamp, AM 1.5G                      | This work                   |
| K-PHI photoanode                                          | ca. 800                                        | 1.23                 | 1.0 M NaOH                            | 100 mW $\text{cm}^{-2}$ , AM 1.5G (Newport) | 1                           |
| CN-MR/NiFeO <sub>x</sub> H <sub>y</sub> electrode         | 472 $\pm$ 10                                   | 1.23                 | 0.1 M KOH                             | 100 mW $\text{cm}^{-2}$ , AM 1.5G (Newport) | 2                           |
| CN <sub>TM</sub> photoanode                               | 353                                            | 1.23                 | 0.1 M KOH                             | 100 mW $\text{cm}^{-2}$ , AM 1.5G (Newport) | 3                           |
| CN-MSG <sub>0.75</sub> /M photoanode                      | 270                                            | 1.23                 | 0.1 M KOH                             | 100 mW $\text{cm}^{-2}$ , AM 1.5G (Newport) | 4                           |
| DPCN photoanode                                           | 242                                            | 1.23                 | 0.5 M H <sub>2</sub> SO <sub>4</sub>  | 150 W Xe lamp, AM 1.5G                      | 5                           |
| CNP films                                                 | 230                                            | 1.23                 | 0.5 M Na <sub>2</sub> SO <sub>4</sub> | Xe lamp, AM 1.5G                            | 6                           |
| CN films                                                  | 228.2                                          | 1.23                 | 0.2 M Na <sub>2</sub> SO <sub>4</sub> | 150 W Xe lamp, AM 1.5G (Newport)            | 7                           |
| 2CSCN films                                               | 200                                            | 1.23                 | 1.0 M NaOH                            | 100 mW $\text{cm}^{-2}$ , AM 1.5G (Newport) | 8                           |
| P/B-layer-doping C <sub>3</sub> N <sub>4</sub> photoanode | 150 $\pm$ 10                                   | 1.23                 | 0.1 M Na <sub>2</sub> SO <sub>4</sub> | 300 W Xe lamp, AM 1.5G                      | 9                           |
| CN-MeM/M <sub>0.20</sub>                                  | 133                                            | 1.23                 | 0.1 M KOH                             | 100 mW $\text{cm}^{-2}$ , AM 1.5G (Newport) | 10                          |
| In situ grown porous CN/rGO films                         | 124.5                                          | 1.23                 | 0.1 M KOH                             | 100 mW $\text{cm}^{-2}$ , AM 1.5G (Newport) | 11                          |
| g-CN PNR array photoanode                                 | 120.5                                          | 1.23                 | 0.1 M Na <sub>2</sub> SO <sub>4</sub> | 500 W Xe lamp, AM 1.5G                      | 12                          |
| 5p-PCN films                                              | ca. 120                                        | 1.23                 | 1.0 M NaOH                            | 100 mW $\text{cm}^{-2}$ , AM 1.5G (Newport) | 13                          |
| phosphorylated PCN films                                  | ca. 120                                        | 1.23                 | 1.0 M NaOH                            | 100 mW $\text{cm}^{-2}$ , AM 1.5G           | 14                          |



|                                                    |         |      |                                       |                                             |    |
|----------------------------------------------------|---------|------|---------------------------------------|---------------------------------------------|----|
|                                                    |         |      |                                       | (Newport)                                   |    |
| SOCN-75 films                                      | 119.2   | 1.23 | 0.1 M Na <sub>2</sub> SO <sub>4</sub> | 150 W Xe lamp, AM 1.5G (Newport)            | 15 |
| CN films                                           | 116     | 1.23 | 0.1 M KOH                             | 100 mW cm <sup>-2</sup> , AM 1.5G (Newport) | 16 |
| PCN photoanode                                     | ca. 110 | 1.23 | 1.0 M NaOH                            | 100 mW cm <sup>-2</sup> , AM 1.5G (Newport) | 17 |
| CN-U <sub>10</sub> M <sub>0.5</sub> photoelectrode | ca. 110 | 1.23 | 0.1 M KOH                             | 100 mW cm <sup>-2</sup> , AM 1.5G (Newport) | 18 |
| Boron-doped CN films                               | 103.2   | 1.23 | 0.1 M Na <sub>2</sub> SO <sub>4</sub> | 150 W Xe lamp, AM 1.5G                      | 19 |
| PCN films                                          | 100     | 1.23 | 1.0 M NaOH                            | 100 mW cm <sup>-2</sup> , AM 1.5G (Newport) | 20 |
| Thio-CA films                                      | 96.2    | 1.23 | 0.2 M Na <sub>2</sub> SO <sub>4</sub> | 150 W Xe lamp, AM 1.5G (Newport)            | 21 |
| CN-rGO <sub>0.5</sub> films                        | 72      | 1.23 | 0.1 M KOH                             | 100 mW cm <sup>-2</sup> , AM 1.5G (Newport) | 22 |

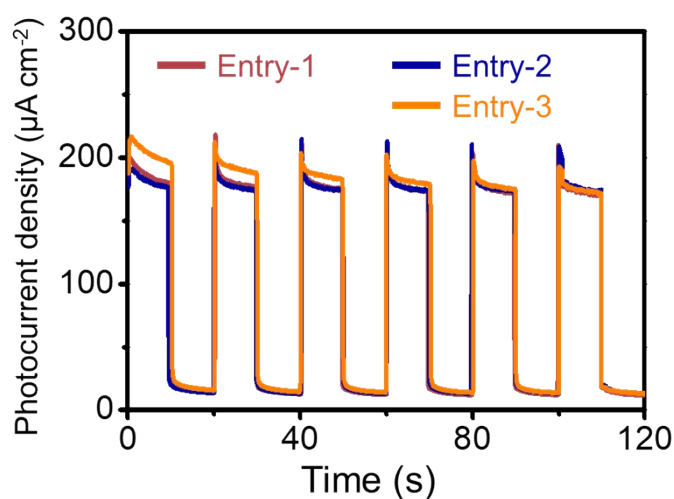

**Figure S9.** Chronoamperometric measurements of the KPCN photoanodes prepared in three individual synthetic batches in 1.0 M NaOH aqueous solution at 1.23 V vs. RHE, on/off cycling of AM 1.5G illumination.

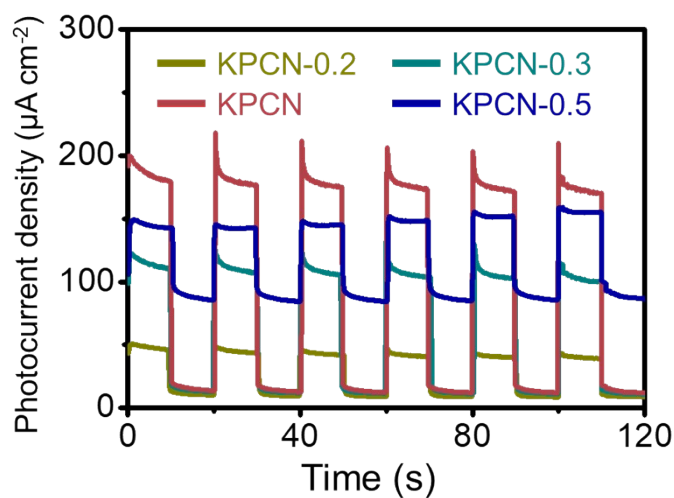

**Figure S10.** Chronoamperometric measurements of the KPCN photoanodes prepared using the precursor mixture with different KOH amounts in 1.0 M NaOH aqueous solution at 1.23 V vs. RHE, on/off cycling of AM 1.5G illumination.

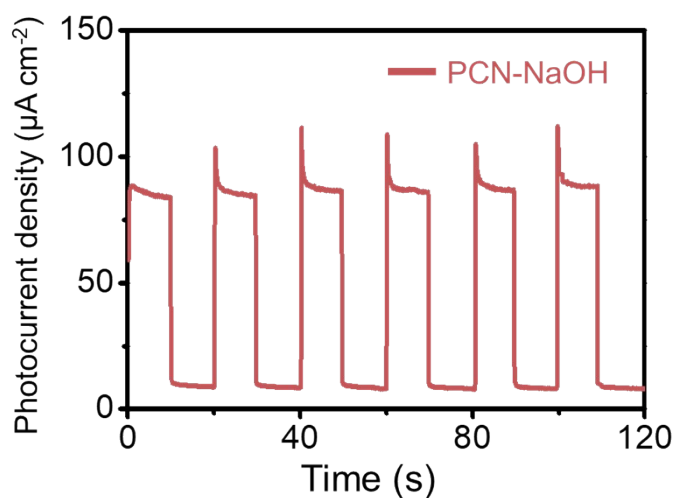

**Figure S11.** Chronoamperometric measurements of the PCN-NaOH photoanodes prepared using the precursor mixture with 2.5 g  $\text{NH}_4\text{SCN}$ , 0.5 g M400 and 0.4 g NaOH in 1.0 M NaOH aqueous solution at 1.23 V vs. RHE, on/off cycling of AM 1.5G illumination.



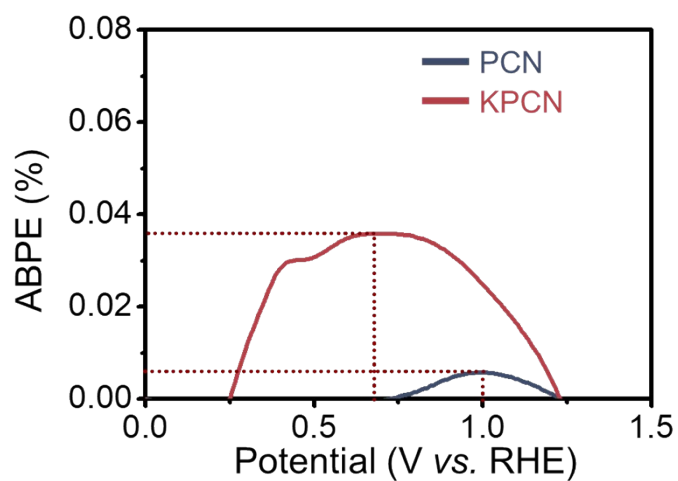

**Figure S12.** ABPE curves of PCN and KPCN calculated from LSV curves.

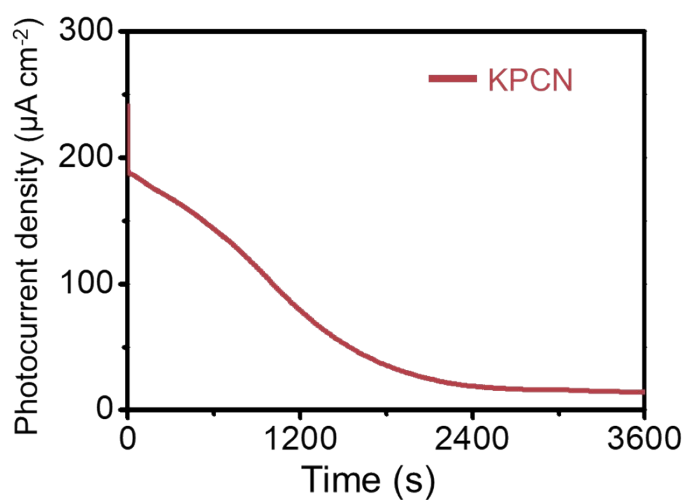

**Figure S13.** Stability measurements of the KPCN photoanode at 1.23 V vs. RHE in 1.0 M NaOH aqueous solution under AM 1.5G illumination.

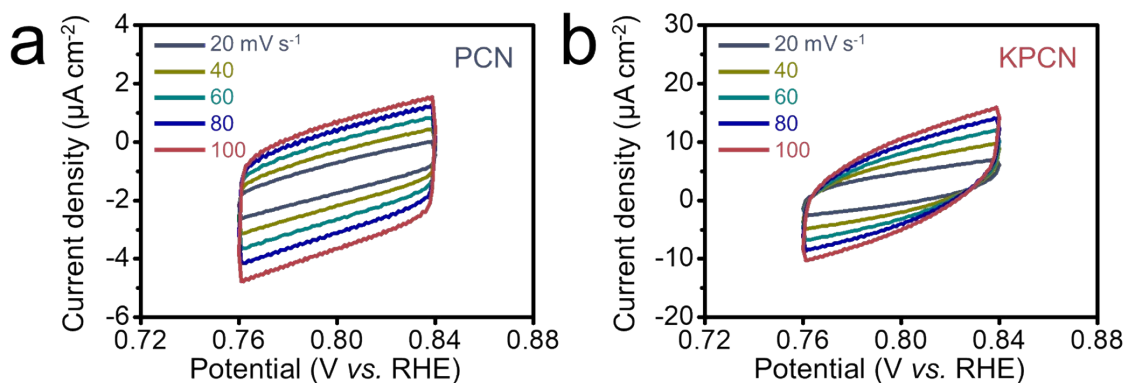

**Figure S14.** Cyclic voltammograms of (a) PCN and (b) KPCN in the region of 0.76~0.84 V vs. RHE under dark.

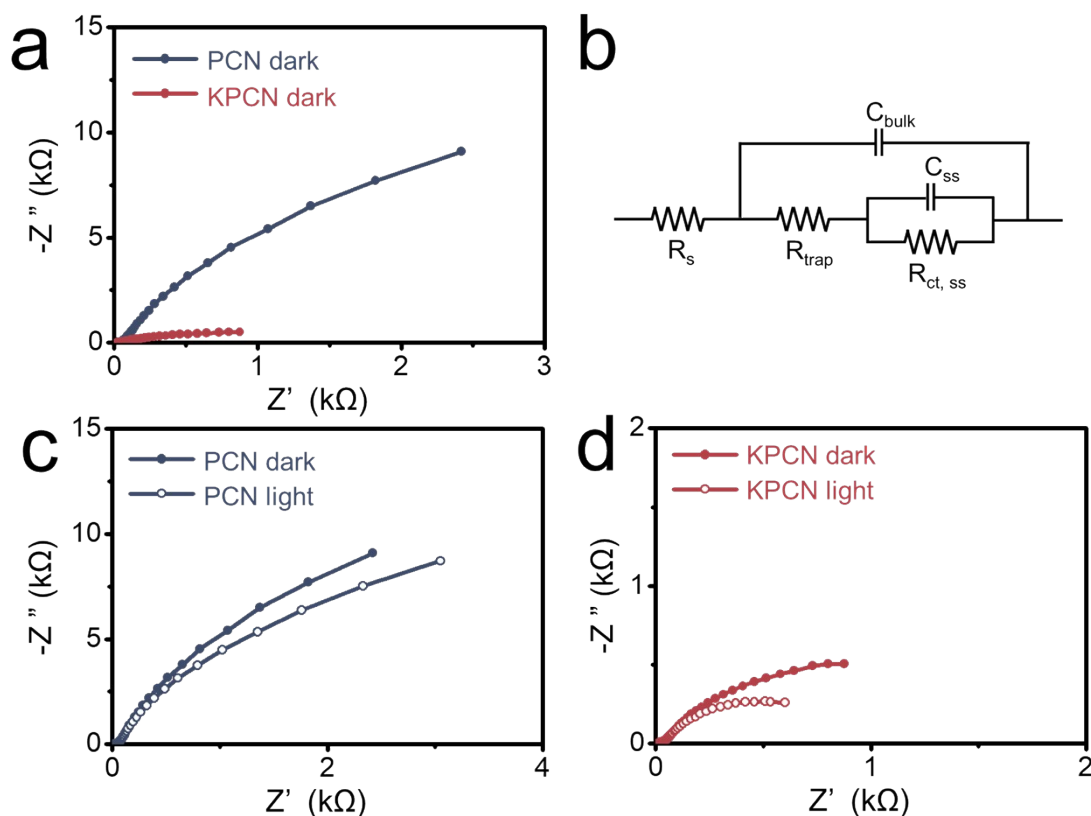

**Figure S15.** (a) Nyquist plots of PCN and KPCN without illumination. (b) the equivalent circuit, which can be fitted to result series resistance ( $R_s$ ), the charge transfer resistance from the surface to solution ( $R_{ct,ss}$ ), the space charge capacitance ( $C_{bulk}$ ), the trapping of holes in the surface states ( $R_{trap}$ ) and steady state concentration of trapped holes ( $C_{ss}$ ). (c) Nyquist plots of PCN under AM 1.5G illumination and off. (d) Nyquist plots of KPCN under AM 1.5G illumination and off.

**Table S3.** Fitted parameters for electrochemical impedance spectroscopy results.

| Samples   | $R_s$ ( $\Omega$ ) | $R_{\text{trap}}$ ( $\Omega$ ) | $C_{\text{bulk}}$ (F)  | $R_{\text{ct, ss}}$ ( $\Omega$ ) | $C_{\text{ss}}$ (F)    |
|-----------|--------------------|--------------------------------|------------------------|----------------------------------|------------------------|
| PCN dark  | 17.46              | 53.13                          | $12.61 \times 10^{-6}$ | 822850                           | $9.01 \times 10^{-6}$  |
| KPCN dark | 12.25              | 41.63                          | $76.39 \times 10^{-6}$ | 1468                             | $98.73 \times 10^{-6}$ |

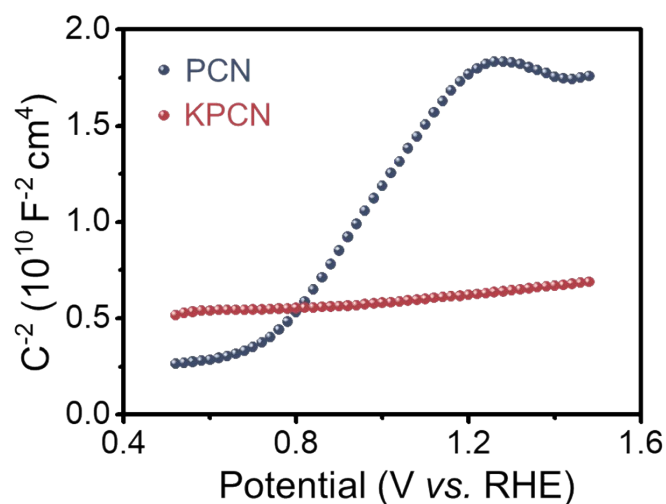

**Figure S16.** Mott-Schottky plots of PCN and KPCN at 1000 Hz without illumination.

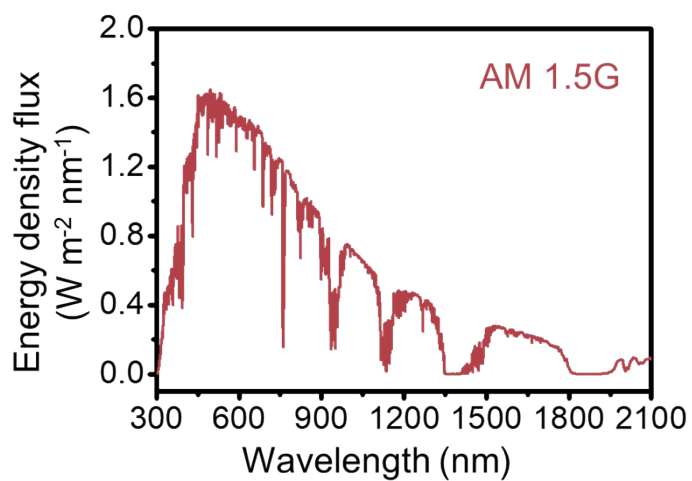

**Figure S17.** Energy density flux for the standard solar spectrum of AM 1.5G.

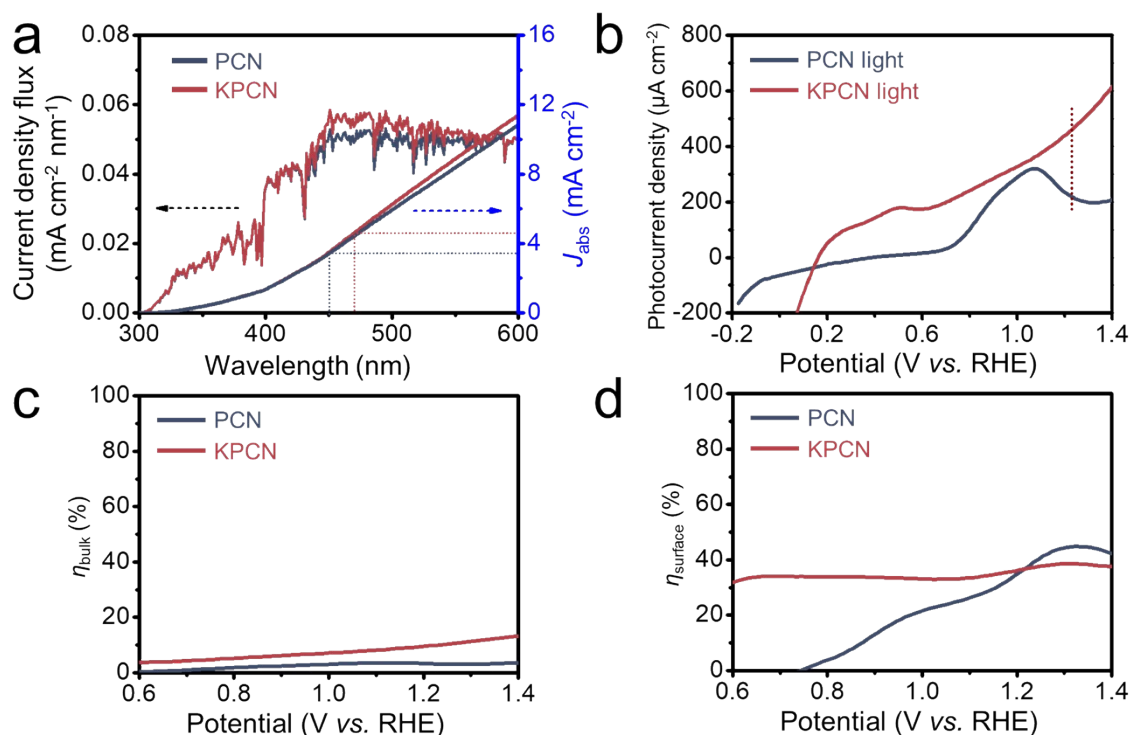

**Figure S18.** (a) The calculated current density fluxes and the integrated current densities ( $J_{abs}$ ) of PCN and KPCN. (b) LSV curves of PCN and KPCN measured in the electrolytes of 1.0 M NaOH containing 0.5 M  $\text{Na}_2\text{SO}_3$  under AM 1.5G illumination. (c) bulk charge separation efficiencies ( $\eta_{bulk}$ ) of PCN and KPCN. (d) surface charge injection efficiencies ( $\eta_{surface}$ ) of PCN and KPCN.

## Reference

1. X. Li, X. Chen, Y. Fang, W. Lin, Y. Hou, M. Anpo, X. Fu and X. Wang, *Chem. Sci.*, 2022, **13**, 7541-7551.
2. N. Karjule, C. Singh, J. Barrio, J. Tzadikov, I. Liberman, M. Volokh, E. Palomares, I. Hod and M. Shalom, *Adv. Funct. Mater.*, 2021, **31**, 2101724.
3. J. Qin, J. Barrio, G. Peng, J. Tzadikov, L. Abisdri, M. Volokh and M. Shalom, *Nat. Commun.*, 2020, **11**, 4701.
4. N. Karjule, J. Barrio, L. Xing, M. Volokh and M. Shalom, *Nano Lett.*, 2020, **20**, 4618-4624.
5. X. Fan, Z. Wang, T. Lin, D. Du, M. Xiao, P. Chen, S. A. Monny, H. Huang, M. Lyu, M. Lu and L. Wang, *Angew. Chem. Int. Ed.*, 2022, **61**, e202204407.
6. Q. Jia, S. Zhang, Z. Gao, P. Yang and Q. Gu, *Catal. Sci. Technol.*, 2019, **9**, 425-435.
7. W. Xiong, S. Chen, M. Huang, Z. Wang, Z. Lu and R. Q. Zhang, *Chemsuschem*, 2018, **11**, 2497-2501.

- 
8. X. Li, J. Wang, J. Xia, Y. Fang, Y. Hou, X. Fu, M. Shalom and X. Wang, *Chemsuschem*, 2022, **15**, e202200330.
  9. P. Luan, Q. Meng, J. Wu, Q. Li, X. Zhang, Y. Zhang, L. A. O'Dell, S. R. Raga, J. Pringle, J. C. Griffith, C. Sun, U. Bach and J. Zhang, *Chemsuschem*, 2020, **13**, 328-333.
  10. J. Xia, N. Karjule, L. Abisdri, M. Volokh and M. Shalom, *Chem. Mater.*, 2020, **32**, 5845-5853.
  11. G. Peng, J. Qin, M. Volokh, C. Liu and M. Shalom, *J Mater. Chem. A*, 2019, **7**, 11718-11723.
  12. B. Guo, L. Tian, W. Xie, A. Batool, G. Xie, Q. Xiang, S. U. Jan, R. Boddula and J. R. Gong, *Nano Lett.*, 2018, **18**, 5954-5960.
  13. X. Li, Z. Cheng, Y. Fang, X. Fu and X. Wang, *Sol. RRL*, 2020, **4**, 2000168.
  14. Y. Fang, X. Li and X. Wang, *Chemsuschem*, 2019, **12**, 2605-2608.
  15. M. Huang, H. Wang, W. Li, Y.-L. Zhao and R.-Q. Zhang, *J Mater. Chem. A*, 2020, **8**, 24005-24012.
  16. G. Peng, J. Albero, H. Garcia and M. Shalom, *Angew. Chem. Int. Ed.*, 2018, **57**, 15807-15811.
  17. Y. Fang, X. Li, Y. Wang, C. Giordano and X. Wang, *Appl. Catal. B*, 2020, **268**, 118398.
  18. A. Tashakory, N. Karjule, L. Abisdri, M. Volokh and M. Shalom, *Adv. Sustain. Syst.*, 2021, **5**, 2100005.
  19. Q. Ruan, W. Luo, J. Xie, Y. Wang, X. Liu, Z. Bai, C. J. Carmalt and J. Tang, *Angew. Chem. Int. Ed.*, 2017, **56**, 8221-8225.
  20. Y. Fang, X. Li and X. Wang, *ACS Catal.*, 2018, **8**, 8774-8780.
  21. W. Xiong, M. Huang, F. Huang and R.-Q. Zhang, *Appl. Surf. Sci.*, 2020, **511**, 145535.
  22. G. Peng, M. Volokh, J. Tzadikov, J. Sun and M. Shalom, *Adv. Energy Mater.*, 2018, **8**, 1800566.
